# Supplementary material for: Safety and Efficacy of a Recombinant Hepatitis E Vaccine
Source: Atypon-hosted journal article supplement (doi:10.1056/nejmoa061847), 2007-02-28
Supplement: nejm_shrestha_895sa1.pdf [file nejm_shrestha_895sa1.pdf]

## Supplementary Appendix

This appendix has been provided by the authors to give readers additional information about their work.

Supplement to: Shrestha MP, Scott RM, Joshi DM, et al. Safety and efficacy of a recombinant hepatitis E vaccine. *N Engl J Med* 2007;356:895-903.

## CLASSIFICATION OF HEPATITIS CASES

Overall, 111 (19 in the vaccine group and 92 in the placebo group) suspected acute hepatitis cases were recorded. Among those 111 suspected cases, 87 (9 in the vaccine group and 78 in the placebo group) were classified as virologically and serologically confirmed definite hepatitis E cases and 24 (10 in the vaccine group and 14 in the placebo group) were classified as not hepatitis E cases (Table S1). Of the 24 not hepatitis E cases, 4 were reported by the investigators as adverse events with a diagnosis of hepatitis E. But on review of those 4 cases (see footnote to Table S1), the DSMB concluded none met the case definition of hepatitis E; in 2 cases, there was no laboratory evidence of acute liver injury, and in 2 other cases, no acute illness evaluation was performed.

**Table S1 Number of suspected, definite, probable and not confirmed HEV cases during surveillance (total vaccinated cohort)**

| HEV disease status                        | Onset                                   | Placebo         | Vaccine        | Total |
|-------------------------------------------|-----------------------------------------|-----------------|----------------|-------|
| Any suspected acute hepatitis (all cases) | Before dose 1                           | 0               | 1              | 1     |
|                                           | Within 14 days after dose 1             | 1               | 3              | 4     |
|                                           | Between 14 days after dose 1 and dose 2 | 5               | 2              | 7     |
|                                           | Within 14 days after dose 2             | 0               | 0              | 0     |
|                                           | Between 14 days after dose 2 and dose 3 | 7               | 4              | 11    |
|                                           | Within 14 days after dose 3             | 1               | 0              | 1     |
|                                           | From 14 days after dose 3               | 78              | 9              | 87    |
|                                           | Total                                   | 92              | 19             | 111   |
| Definite hepatitis E cases                | Before dose 1                           | 0               | 0              | 0     |
|                                           | Within 14 days after dose 1             | 1               | 3              | 4     |
|                                           | Between 14 days after dose 1 and dose 2 | 3               | 2              | 5     |
|                                           | Within 14 days after dose 2             | 0               | 0              | 0     |
|                                           | Between 14 days after dose 2 and dose 3 | 7               | 1              | 8     |
|                                           | Within 14 days after dose 3             | 1               | 0              | 1     |
|                                           | From 14 days after dose 3               | 66              | 3              | 69    |
|                                           | Total                                   | 78              | 9              | 87    |
| Probable hepatitis E cases                | Total                                   | 0               | 0              | 0     |
| Not confirmed hepatitis E cases           | Before dose 1                           | 0               | 1              | 1     |
|                                           | Within 14 days after dose 1             | 0               | 0              | 0     |
|                                           | Between 14 days after dose 1 and dose 2 | 2 <sup>1</sup>  | 0              | 2     |
|                                           | Within 14 days after dose 2             | 0               | 0              | 0     |
|                                           | Between 14 days after dose 2 and dose 3 | 0               | 3              | 3     |
|                                           | Within 14 days after dose 3             | 0               | 0              | 0     |
|                                           | From 14 days after dose 3               | 12 <sup>2</sup> | 6 <sup>3</sup> | 18    |
|                                           | Total                                   | 14              | 10             | 24    |

<sup>1</sup> Subjects 2359 and 2567 are “not hepatitis E”. They were acute HEV infection with viremia but no confirmed liver injury.

<sup>2</sup> Subject 2421 had illness (start date 17JUL2003, end date 25AUG2003) with jaundice, but was not evaluated for clinical hepatitis. A serum specimen collected 01DEC2003 had ALT 29.1 U/L, HEV RT-PCR negative, rHEV IgM 49 WR U/ml and rHEV Ig 852 WR U/ml, results consistent with past HEV infection. The DSMB classified this event “not hepatitis E”.

<sup>3</sup> Subject 2860 had illness (start date JAN2003, end date MAR2003) with jaundice, but was not evaluated for clinical hepatitis. A serum specimen collected 20OCT2003 had ALT 18.0 U/L, HEV RT-PCR negative, rHEV IgM 195.9 WR U/ml and rHEV Ig 560.6 WR U/ml, results consistent with past HEV infection. The DSMB classified this event “not hepatitis E”.

The 111 clinically suspected acute hepatitis E cases were also tested for determination of co-infection. Of them, 8 had serological evidence of recent leptospirosis (of which 7 were also confirmed definite hepatitis E), 4 had serological evidence of recent scrub typhus (all 4 were also confirmed definite hepatitis E), 3 had serologically confirmed hepatitis B (all 3 were also confirmed definite hepatitis E) and 1 had serologically confirmed hepatitis C and definite hepatitis E (Table ).

**Table S2 Distribution between treatment groups of clinically suspected hepatitis and diagnoses of hepatotropic disease cases occurring during the trial (total vaccinated cohort)**

|                                                                                      | Placebo group<br>n | Vaccine group<br>n | Total<br>n |
|--------------------------------------------------------------------------------------|--------------------|--------------------|------------|
| Clinically-suspected hepatitis E                                                     | 92                 | 19                 | 111        |
| Serologically-confirmed hepatitis A (HAV-IgM)                                        | 0                  | 0 <sup>1</sup>     | 0          |
| Serologically-confirmed hepatitis B (HBc-IgM)                                        | 1 <sup>2</sup>     | 0                  | 1          |
| Hepatitis B carrier (HBs-Ag positive but HBc-IgM negative)                           | 2 <sup>3,4</sup>   | 0                  | 2          |
| Serologically-detected hepatitis C (HCV-IgG)                                         | 1 <sup>5</sup>     | 0                  | 1          |
| Serologically-detected leptospirosis (Lepto-MAT and Lepto-IgM)                       | 6 <sup>3,5,6</sup> | 2 <sup>7,8</sup>   | 8          |
| Serologically detected scrub typhus (IgM by PANBIO test and IgM or IgG western blot) | 3 <sup>9,10</sup>  | 1 <sup>11</sup>    | 4          |
| Virologically and serologically confirmed hepatitis E                                | 78                 | 9                  | 87         |

<sup>1</sup> Subject 1374 is a “not hepatitis E” case and had an equivocal result for HAV-IgM

<sup>2</sup> Subject 759 is a definite hepatitis E case and had positive tests for HBc-IgM, HBV DNA (by PCR) and anti-HBs but negative tests for anti-HBc and HBsAg (**Hepatitis E and acute hepatitis B**)

<sup>3</sup> Subject 509 is a definite hepatitis E case and had a positive test for HBsAg but a negative test for HBc-IgM (**Hepatitis E in a HBV carrier**); he also had a positive lepto-MAT (leptospirosis micro-agglutination test) and a positive test for lepto-IgM results (**Possible recent leptospirosis infection**)

<sup>4</sup> Subject 1271 is a definite hepatitis E case and had a positive test for HBsAg but a negative test for HBc-IgM (**Hepatitis E in a HBV carrier**)

<sup>5</sup> Subject 2789 is a definite hepatitis E case and had a positive test for HCV-IgG but a negative test for HCV RNA (by RT-PCR) (**Hepatitis E in an HCV-exposed subject**); he also had a positive lepto-MAT and a positive test for lepto-IgM (**Possible recent leptospirosis infection**)

<sup>6</sup> Four subjects (127, 337, 1155 and 2343) are definite hepatitis E cases and had positive lepto-MATs and positive tests for lepto-IgM (**Hepatitis E in subjects with possible recent leptospirosis infection**)

<sup>7</sup> Subject 1544 is a definite hepatitis E case and had a positive lepto-MAT and a positive test for lepto-IgM (**Hepatitis E in a subject with possible recent leptospirosis infection**)

<sup>8</sup> Subject 1801 is a “not hepatitis E” case but had a positive lepto-MAT and a positive test for lepto-IgM (**Possible recent leptospirosis infection**)

<sup>9</sup> Subject 2331 is a definite hepatitis E case and had a positive test for scrub typhus IgM (PANBIO test) with a negative IgM western blot but a positive IgG western blot (**Hepatitis E in a subject with possible recent scrub typhus infection**)

<sup>10</sup> Two subjects (1516 and 2164) are definite hepatitis E case and had positive tests for scrub typhus IgM (PANBIO test) with positive IgM but negative IgG western blots (**Hepatitis E in subjects with possible recent scrub typhus infection**)

<sup>11</sup> Subject 2126 is a definite hepatitis E case and had a positive scrub typhus IgM (PANBIO test) with a positive IgM western blot but a negative IgG western blot (**Hepatitis E in a subject with a possible recent scrub typhus infection**)

## CHARACTERIZATION OF HEPATITIS E CASES

The intensity of illness among the 87 definite hepatitis E cases identified in the total vaccinated cohort was evaluated by tabulating descriptive statistics for three parameters: duration of illness in days; maximum ALT and maximum total bilirubin, considering up to 4 weekly blood specimens collected from the date of the initial clinical evaluation. These parameters, stratified by treatment group, are shown in the tables below.

**TABLE S3 Descriptive statistics for duration (in days) of hepatitis E (Definite cases, total vaccinated cohort)**

| Group   | N  | Mean  | SD    | Min   | Q1    | Median | Q3    | Max   |
|---------|----|-------|-------|-------|-------|--------|-------|-------|
| Placebo | 78 | 32.53 | 14.56 | 8.00  | 23.00 | 29.00  | 39.00 | 82.00 |
| Vaccine | 9  | 30.33 | 8.41  | 18.00 | 26.00 | 30.00  | 39.00 | 42.00 |
| Total   | 87 | 32.30 | 14.03 | 8.00  | 23.00 | 29.00  | 39.00 | 82.00 |

N = number of subjects with definite hepatitis E  
SD = standard deviation

**TABLE S4 Descriptive statistics for maximum ALT (Definite cases, total vaccinated cohort)**

| Characteristic | Parameters     | Placebo | Vaccine | Total   |
|----------------|----------------|---------|---------|---------|
| ALT            | N              | 78      | 9       | 87      |
|                | Missing        | 0       | 0       | 0       |
|                | Mean           | 1487.57 | 1799.39 | 1519.83 |
|                | SD             | 1134.12 | 1147.18 | 1132.77 |
|                | Minimum        | 156.00  | 490.00  | 156.00  |
|                | Q1             | 688.00  | 1040.00 | 756.00  |
|                | Median         | 1245.50 | 1290.00 | 1248.00 |
|                | Q3             | 1868.00 | 2323.00 | 1995.00 |
|                | Maximum        | 4829.00 | 4214.00 | 4829.00 |
|                | Geometric mean | 1085.17 | 1503.79 | 1122.42 |

N = number of subjects  
n = number of subjects in a given category  
Value = value of the considered parameter

**TABLE S5 Descriptive statistics for maximum total bilirubin (Definite cases, total vaccinated cohort)**

| <b>Characteristic</b> | <b>Parameters or Categories</b> | <b>Placebo</b> | <b>Vaccine</b> | <b>Total</b> |
|-----------------------|---------------------------------|----------------|----------------|--------------|
| Bilirubin             | N                               | 78             | 9              | 87           |
|                       | Missing                         | 0              | 0              | 0            |
|                       | Mean                            | 10.36          | 10.35          | 10.36        |
|                       | SD                              | 6.13           | 5.14           | 6.01         |
|                       | Minimum                         | 0.62           | 5.00           | 0.62         |
|                       | Q1                              | 6.22           | 7.56           | 6.61         |
|                       | Median                          | 8.98           | 8.00           | 8.95         |
|                       | Q3                              | 13.11          | 10.90          | 13.11        |
|                       | Maximum                         | 31.40          | 19.62          | 31.40        |
|                       | Geometric mean                  | 8.44           | 9.41           | 8.54         |

N = number of subjects

n = number of subjects in a given category

Value = value of the considered parameter

## **DIAGNOSES FOR “NOT HEPATITIS E” CASES**

The Data Safety Monitoring Board reviewed all data available for each suspected hepatitis case and classified each as Definite Hepatitis E, Probable Hepatitis E, Not Hepatitis E, according to case definitions specified in the study protocol. Table S6 shown on the next page summarizes data for the 24 “not hepatitis E” cases. In no case, was a definite cause of liver injury or jaundice established by testing for serum markers related to HAV, HBV, HCV, scrub typhus, or leptospirosis.

**Table S6 Summary data for “not hepatitis E” cases**

| Subj no. | Max ALT | Max T-bili | HAV IgM | HBV (IgM and/or HBsA)g | HCV Ig | Lepto-spirosis serology | Scrub typhus serology | Illness start date | Illness end date | Duration of illness (days) | Diagnosis                                                    |
|----------|---------|------------|---------|------------------------|--------|-------------------------|-----------------------|--------------------|------------------|----------------------------|--------------------------------------------------------------|
| 0086     | 23.0    | 2.90       | neg x4  | neg x4                 | neg x4 | MAT neg                 | IgM neg x4            | 15-Sep-01          | 2-Oct-01         | 17                         | Jaundice, cause unknown                                      |
| 0475     | 31.8    | 4.76       | neg x4  | neg x4                 | neg x4 | IgM neg x4              | IgM neg x4            | 19-Sep-02          | 8-Oct-02         | 19                         | Jaundice, cause unknown                                      |
| 0663     | 179.5   | 0.46       | neg x4  | neg x4                 | neg x4 | IgM neg x4              | IgM neg x4            | 7-May-02           | 31-May-02        | 24                         | Liver injury, cause unknown                                  |
| 1047     | 135.3   | 1.01       | neg x4  | neg x4                 | neg x4 | IgM neg x4              | IgM neg x4            | 3-Sep-02           | 24-Sep-02        | 21                         | Liver injury, cause unknown                                  |
| 1240     | 56.5    | 2.74       | neg x4  | neg x4                 | neg x4 | IgM neg x4              | IgM neg x4            | 31-Jan-03          | 17-Feb-03        | 17                         | Jaundice, cause unknown                                      |
| 1374     | 189.0   | 4.00       | neg x2  | neg x4                 | neg x4 | IgM neg x4              | IgM neg x4            | 17-Jul-01          | 20-Aug-01        | 34                         | Jaundice and liver injury, cause unknown                     |
| 1402     | 90.6    | 5.71       | neg x2  | neg x2                 | neg x2 | IgM neg x2              | IgM neg x2            | 31-May-02          | 10-Oct-02        | 132                        | Jaundice and liver injury, cause unknown                     |
| 1556     | 33.7    | 2.74       | neg x4  | neg x4                 | neg x4 | IgM neg x4              | IgM neg x4            | 19-Jul-02          | 29-Jul-02        | 10                         | Jaundice, cause unknown                                      |
| 1801     | 48.3    | 4.30       | neg x2  | neg x2                 | neg x2 | MAT pos                 | IgM neg x2            | 15-Jan-02          | 27-Nov-02        | 316                        | Incomplete sampling; jaundice, possible recent leptospirosis |
| 1910     | 73.3    | 13.82      | neg x4  | neg x4                 | neg x4 | MAT neg                 | IgM neg x4            | 18-Jun-03          | 21-Jul-03        | 33                         | Jaundice, cause unknown                                      |
| 2020     | 32.8    | 2.75       | neg x4  | neg x4                 | neg x4 | IgM neg x4              | IgM neg x4            | 27-Jul-02          | 2-Sep-02         | 37                         | Jaundice, cause unknown                                      |
| 2078     | 42.8    | 3.79       | neg x4  | neg x4                 | neg x4 | IgM neg x4              | IgM neg x4            | 22-May-02          | 16-Jul-02        | 55                         | Jaundice, cause unknown                                      |
| 2082     | 48.2    | 2.12       | neg x4  | neg x4                 | neg x4 | IgM neg x4              | IgM neg x4            | 23-Jun-02          | 9-Sep-02         | 78                         | Jaundice, cause unknown                                      |
| 2314     | 43.2    | 2.67       | neg x4  | neg x4                 | neg x4 | IgM neg x4              | IgM neg x4            | 29-Oct-02          | 4-Dec-02         | 36                         | Jaundice, cause unknown                                      |

Web-only Supplement for “Safety and Efficacy of a Recombinant Hepatitis E Vaccine”

| Subj no. | Max ALT | Max T-bili | HAV IgM | HBV (IgM and/or HBsA)g | HCV Ig | Leptospiroserology | Scrub typhus serology | Illness start date | Illness end date | Duration of illness (days) | Diagnosis                                                                                                                           |
|----------|---------|------------|---------|------------------------|--------|--------------------|-----------------------|--------------------|------------------|----------------------------|-------------------------------------------------------------------------------------------------------------------------------------|
| 2359     | 101.8   | 1.60       | neg x4  | neg x4                 | neg x4 | IgM neg x4         | IgM neg x4            | Unk Aug 01         | 26-Sep-02        | ≤57                        | Not hepatitis; HEV infection confirmed by viremia and IgM                                                                           |
| 2421     | Unk     | Unk        | neg x1  | neg x1                 | neg x1 | IgM neg x1         | IgM neg x1            | 17-Jul-03          | 25-Aug-03        | 39                         | No timely sampling (6 mos convalescent specimen only); hepatitis not confirmed                                                      |
| 2475     | 92.4    | 2.39       | neg x4  | neg x4                 | neg x4 | IgM neg x4         | IgM neg x4            | 6-May-02           | 1-Jun-02         | 26                         | Jaundice, cause unknown                                                                                                             |
| 2483     | 44.2    | 2.66       | neg x4  | neg x4                 | neg x4 | IgM neg x4         | IgM neg x4            | 3-Jul-02           | 13-Jul-02        | 10                         | Jaundice, cause unknown                                                                                                             |
| 2489     | 253.8   | 2.66       | neg x4  | neg x4                 | neg x4 | IgM neg x4         | IgM neg x4            | 24-Jul-03          | 25-Sep-03        | 63                         | Jaundice and liver injury, cause unknown                                                                                            |
| 2567     | 46.7    | 1.44       | neg x1  | neg x1                 | neg x1 | IgM neg x1         | IgM neg x1            | 10-Sep-03          | 8-Oct-03         | 28                         | No timely sampling (6 week convalescent specimen only); hepatitis not confirmed; hepatitis E infection confirmed by viremia and IgM |
| 2647     | 10.9    | 2.27       | neg x4  | neg x4                 | neg x4 | IgM neg x4         | IgM neg x4            | 10-Oct-02          | 20-Oct-02        | 10                         | Jaundice, cause unknown                                                                                                             |
| 2860     | Unk     | Unk        | neg x1  | neg x1                 | neg x1 | IgM neg x1         | IgM neg x1            | Unk Jan 03         | Unk Mar 03       | ≤90                        | No timely sampling (10mos convalescent specimen only); hepatitis not confirmed                                                      |
| 2907     | 98.8    | 2.22       | neg x4  | neg x4                 | neg x4 | IgM neg x4         | IgM neg x4            | 10-Aug-02          | 21-Aug-02        | 11                         | Jaundice, cause unknown                                                                                                             |
| 2944     | 27.3    | 2.11       | neg x4  | neg x4                 | neg x4 | IgM neg x4         | IgM neg x4            | 25-Aug-02          | 2-Sep-02         | 8                          | Jaundice, cause unknown                                                                                                             |

## VACINE EFFICACY

The impact of potential covariates (age, pre-vaccination anti-rHEV antibody concentration) on vaccine efficacy was an *a priori* analysis; data from the Clinical Study Report are presented below.

**Table S7 Attack rate of hepatitis E by covariates and overall (total cohort for analysis of efficacy after dose 3)**

|                   | Attack Rates |   |     |         |         |    |     |           | 2-sided exact p-value | VE   | 95% C.I   |
|-------------------|--------------|---|-----|---------|---------|----|-----|-----------|-----------------------|------|-----------|
|                   | Vaccine      |   |     |         | Placebo |    |     |           |                       |      |           |
|                   | N            | n | AR  | 95% CI  | N       | n  | AR  | 95% CI    |                       |      |           |
| Age : <25 Years   | 556          | 1 | 0.2 | 0.0,1.0 | 561     | 45 | 8.0 | 5.9, 10.6 | <0.001                | 97.8 | 83.8,99.7 |
| Age : ≥25 Years   | 342          | 2 | 0.6 | 0.1,2.1 | 335     | 21 | 6.3 | 3.9,9.4   | <0.001                | 90.7 | 60.5,97.8 |
| PVT : ≤10 WR U/mL | 847          | 3 | 0.4 | 0.1,1.0 | 845     | 66 | 7.8 | 6.1,9.8   | <0.001                | 95.5 | 85.6,98.6 |
| PVT : >10 WR U/mL | 51           | 0 | 0.0 | 0.0,7.0 | 51      | 0  | 0.0 | 0.0,7.0   | NA                    | NA   | NA        |
| Overall           | 898          | 3 | 0.3 | 0.1,1.0 | 896     | 66 | 7.4 | 5.7,9.3   | <0.001                | 95.5 | 85.6,98.6 |

N = number of subjects; n = number of subjects with hepatitis E

AR =Attack rate = n / N

PVT=Pre-Vaccination Concentration

AR = Attack Rate (%) = n x 100 / N

AR 95%CI = 95% Confidence interval on attack rates estimated using the exact method for binomial variables

2-sided exact p-value = 2-sided p-value from Fisher's exact test to compare the attack rates

VE= Vaccine Efficacy (%) =  $1 - \frac{AR_{Vaccine}}{AR_{Placebo}}$  = 1-Relative risk

VE 95% CI = 95% Confidence interval on vaccine efficacy based on the Mantel-Haenszel 95% CI on relative risk

NA = Not Applicable

The impact of covariates on vaccine efficacy was also determined using logistic regression. Age and pre-vaccination anti-rHEV concentrations had no impact on vaccine efficacy, estimated as 95.8% with or without adjustment.

**Table S8 Vaccine efficacy against hepatitis E disease cases by covariates and overall (total cohort for analysis of efficacy after dose 3)**

|                                            | (Vaccine N =898)<br>(Placebo N =896) |                 |         |
|--------------------------------------------|--------------------------------------|-----------------|---------|
|                                            | V.E.                                 | 95% CI for V.E. | p-value |
| Unadjusted                                 | 95.8                                 | 88.6 - 99.0     | <0.001  |
| Adjusted for age                           | 95.8                                 | 88.6 - 99.0     | <0.001  |
| Adjusted for Pre-Vaccination Concentration | 95.8                                 | 88.7 - 99.0     | <0.001  |

N = Number of subjects

Unadjusted = logistic regression without covariates

Adjusted for age = logistic regression adjusted by age category (< 25 or ≥ 25 Years)

Adjusted for Pre-Vaccination Concentration = logistic regression adjusted by Pre-Vaccination anti-rHEV Concentration category (≤10 or >10 WR U/mL)

V.E. = Vaccine efficacy obtained from logistic regression

95% CI = 95% confidence interval obtained from logistic regression

P-value = result of comparison of attack rates between groups by Fisher’s exact test (unadjusted) / Mantel Haenszel test (adjusted)

## VACCINE SAFETY

Additional tabulated safety data from pre-specified descriptive analyses comparing vaccine and placebo groups in the total vaccinated cohort or named subset, prepared for the Clinical Study Report, are presented below. Adverse events are grouped within MedRA system-organ-class categories. In these adverse event tabulations, hepatitis E cases are censored

Tables S9 presents unsolicited adverse events in the 1,800 subjects who had no extra monitoring to record solicited symptoms after vaccination (total vaccinated cohort minus the reactogenicity subset). Table S10 presents unsolicited adverse events in the 200 subjects who had additional monitoring to record solicited symptoms (reactogenicity subset).

**TABLE S9 Percentage of subjects reporting the occurrence of unsolicited symptoms (excluding Hepatitis E) classified by MedDRA Primary System Organ Class within the 31-day (Days 0-30) post-vaccination period (total vaccinated cohort minus the reactogenicity subset)**

| Primary System Organ Class (CODE)                               | Placebo<br>N = 900 |      |        |      | Vaccine<br>N = 900 |      |        |      |
|-----------------------------------------------------------------|--------------------|------|--------|------|--------------------|------|--------|------|
|                                                                 | n                  | %    | 95% CI |      | n                  | %    | 95% CI |      |
|                                                                 |                    |      | LL     | UL   |                    |      | LL     | UL   |
| At least one symptom                                            | 224                | 24.9 | 22.1   | 27.8 | 227                | 25.2 | 22.4   | 28.2 |
| ----- ( )                                                       | 0                  | 0.0  | 0.0    | 0.4  | 1                  | 0.1  | 0.0    | 0.6  |
| Blood and lymphatic system disorders (10005329)                 | 0                  | 0.0  | 0.0    | 0.4  | 2                  | 0.2  | 0.0    | 0.8  |
| Congenital, familial and genetic disorders (10010331)           | 0                  | 0.0  | 0.0    | 0.4  | 2                  | 0.2  | 0.0    | 0.8  |
| Ear and labyrinth disorders (10013993)                          | 4                  | 0.4  | 0.1    | 1.1  | 0                  | 0.0  | 0.0    | 0.4  |
| Eye disorders (10015919)                                        | 4                  | 0.4  | 0.1    | 1.1  | 3                  | 0.3  | 0.1    | 1.0  |
| Gastrointestinal disorders (10017947)                           | 43                 | 4.8  | 3.5    | 6.4  | 52                 | 5.8  | 4.3    | 7.5  |
| General disorders and administration site conditions (10018065) | 46                 | 5.1  | 3.8    | 6.8  | 48                 | 5.3  | 4.0    | 7.0  |
| Hepatobiliary disorders (10019805)                              | 1                  | 0.1  | 0.0    | 0.6  | 2                  | 0.2  | 0.0    | 0.8  |
| Immune system disorders (10021428)                              | 3                  | 0.3  | 0.1    | 1.0  | 3                  | 0.3  | 0.1    | 1.0  |
| Infections and infestations (10021881)                          | 84                 | 9.3  | 7.5    | 11.4 | 74                 | 8.2  | 6.5    | 10.2 |
| Injury, poisoning and procedural complications (10022117)       | 11                 | 1.2  | 0.6    | 2.2  | 15                 | 1.7  | 0.9    | 2.7  |
| Metabolism and nutrition disorders (10027433)                   | 3                  | 0.3  | 0.1    | 1.0  | 3                  | 0.3  | 0.1    | 1.0  |
| Musculoskeletal and connective tissue disorders (10028395)      | 15                 | 1.7  | 0.9    | 2.7  | 17                 | 1.9  | 1.1    | 3.0  |
| Nervous system disorders (10029205)                             | 54                 | 6.0  | 4.5    | 7.8  | 40                 | 4.4  | 3.2    | 6.0  |
| Psychiatric disorders (10037175)                                | 2                  | 0.2  | 0.0    | 0.8  | 4                  | 0.4  | 0.1    | 1.1  |
| Renal and urinary disorders (10038359)                          | 0                  | 0.0  | 0.0    | 0.4  | 4                  | 0.4  | 0.1    | 1.1  |
| Reproductive system and breast disorders (10038604)             | 1                  | 0.1  | 0.0    | 0.6  | 2                  | 0.2  | 0.0    | 0.8  |
| Respiratory, thoracic and mediastinal disorders (10038738)      | 9                  | 1.0  | 0.5    | 1.9  | 12                 | 1.3  | 0.7    | 2.3  |
| Skin and subcutaneous tissue disorders (10040785)               | 9                  | 1.0  | 0.5    | 1.9  | 12                 | 1.3  | 0.7    | 2.3  |
| Surgical and medical procedures (10042613)                      | 3                  | 0.3  | 0.1    | 1.0  | 5                  | 0.6  | 0.2    | 1.3  |

At least one symptom = at least one symptom experienced (regardless of the MedDRA Primary System Organ Class)

N = number of subjects with at least one administered dose

n/% = number/percentage of subjects reporting at least once the symptom

95% CI= exact 95% confidence interval; LL = Lower Limit, UL = Upper Limit

Data source = Appendix table IICi

**TABLE S10 Percentage of subjects reporting the occurrence of unsolicited symptoms classified by MedDRA Primary System Organ Class within the 31-day (Days 0-30) post-vaccination period (reactogenicity subset)**

| Primary System Organ Class (CODE)                               | Placebo<br>N = 100 |      |        |      | Vaccine<br>N = 100 |      |        |      |
|-----------------------------------------------------------------|--------------------|------|--------|------|--------------------|------|--------|------|
|                                                                 | n                  | %    | 95% CI |      | n                  | %    | 95% CI |      |
|                                                                 |                    |      | LL     | UL   |                    |      | LL     | UL   |
| At least one symptom                                            | 27                 | 27.0 | 18.6   | 36.8 | 28                 | 28.0 | 19.5   | 37.9 |
| Blood and lymphatic system disorders (10005329)                 | 0                  | 0.0  | 0.0    | 3.6  | 1                  | 1.0  | 0.0    | 5.4  |
| Eye disorders (10015919)                                        | 0                  | 0.0  | 0.0    | 3.6  | 1                  | 1.0  | 0.0    | 5.4  |
| Gastrointestinal disorders (10017947)                           | 8                  | 8.0  | 3.5    | 15.2 | 6                  | 6.0  | 2.2    | 12.6 |
| General disorders and administration site conditions (10018065) | 6                  | 6.0  | 2.2    | 12.6 | 8                  | 8.0  | 3.5    | 15.2 |
| Hepatobiliary disorders (10019805)                              | 0                  | 0.0  | 0.0    | 3.6  | 1                  | 1.0  | 0.0    | 5.4  |
| Immune system disorders (10021428)                              | 1                  | 1.0  | 0.0    | 5.4  | 0                  | 0.0  | 0.0    | 3.6  |
| Infections and infestations (10021881)                          | 15                 | 15.0 | 8.6    | 23.5 | 11                 | 11.0 | 5.6    | 18.8 |
| Injury, poisoning and procedural complications (10022117)       | 1                  | 1.0  | 0.0    | 5.4  | 1                  | 1.0  | 0.0    | 5.4  |
| Metabolism and nutrition disorders (10027433)                   | 1                  | 1.0  | 0.0    | 5.4  | 0                  | 0.0  | 0.0    | 3.6  |
| Musculoskeletal and connective tissue disorders (10028395)      | 2                  | 2.0  | 0.2    | 7.0  | 1                  | 1.0  | 0.0    | 5.4  |
| Nervous system disorders (10029205)                             | 2                  | 2.0  | 0.2    | 7.0  | 6                  | 6.0  | 2.2    | 12.6 |
| Renal and urinary disorders (10038359)                          | 0                  | 0.0  | 0.0    | 3.6  | 1                  | 1.0  | 0.0    | 5.4  |
| Respiratory, thoracic and mediastinal disorders (10038738)      | 1                  | 1.0  | 0.0    | 5.4  | 4                  | 4.0  | 1.1    | 9.9  |
| Skin and subcutaneous tissue disorders (10040785)               | 1                  | 1.0  | 0.0    | 5.4  | 1                  | 1.0  | 0.0    | 5.4  |
| Surgical and medical procedures (10042613)                      | 0                  | 0.0  | 0.0    | 3.6  | 1                  | 1.0  | 0.0    | 5.4  |

At least one symptom = at least one symptom experienced (regardless of the MedDRA Primary System Organ Class)

N = number of subjects with at least one administered dose

n/% = number/percentage of subjects reporting at least once the symptom

95% CI= exact 95% confidence interval; LL = Lower Limit, UL = Upper Limit

Data source = Appendix table IICi

For table S10, there were no hepatitis E cases to exclude.

None of the differences between vaccine and placebo with regards to occurrence of any unsolicited adverse event reported during the 30-day follow-up period was statistically significant (P-value <0.05, no adjustment for multiplicity).

Table S11 presents serious adverse events in the total vaccinated cohort, grouped by MedDRA system-organ-class.

**Table S11 Percentage of subjects reporting the occurrence of Serious Adverse Events (excluding Hepatitis E) classified by MedDRA Primary System Organ Class, during the entire follow-up period (total vaccinated cohort)**

| Primary System Organ Class (CODE)                                              | Placebo<br>N = 1000 |      |        |      | Vaccine<br>N = 1000 |      |        |      |
|--------------------------------------------------------------------------------|---------------------|------|--------|------|---------------------|------|--------|------|
|                                                                                | n                   | %    | 95% CI |      | n                   | %    | 95% CI |      |
|                                                                                |                     |      | LL     | UL   |                     |      | LL     | UL   |
| At least one symptom                                                           | 137                 | 13.7 | 11.4   | 15.7 | 135                 | 13.5 | 11.3   | 15.6 |
| Blood and lymphatic system disorders (10005329)                                | 0                   | 0.0  | 0.0    | 0.4  | 3                   | 0.3  | 0.1    | 0.9  |
| Cardiac disorders (10007541)                                                   | 1                   | 0.1  | 0.0    | 0.6  | 1                   | 0.1  | 0.0    | 0.6  |
| Congenital, familial and genetic disorders (10010331)                          | 2                   | 0.2  | 0.0    | 0.7  | 1                   | 0.1  | 0.0    | 0.6  |
| Ear and labyrinth disorders (10013993)                                         | 0                   | 0.0  | 0.0    | 0.4  | 1                   | 0.1  | 0.0    | 0.6  |
| Eye disorders (10015919)                                                       | 2                   | 0.2  | 0.0    | 0.7  | 1                   | 0.1  | 0.0    | 0.6  |
| Gastrointestinal disorders (10017947)                                          | 9                   | 0.9  | 0.4    | 1.7  | 9                   | 0.9  | 0.4    | 1.7  |
| General disorders and administration site conditions (10018065)                | 8                   | 0.8  | 0.3    | 1.6  | 6                   | 0.6  | 0.2    | 1.3  |
| Hepatobiliary disorders (10019805)                                             | 10                  | 1.0  | 0.5    | 1.8  | 8                   | 0.8  | 0.3    | 1.6  |
| Infections and infestations (10021881)                                         | 73                  | 7.3  | 5.5    | 8.7  | 73                  | 7.3  | 5.5    | 8.7  |
| Injury, poisoning and procedural complications (10022117)                      | 18                  | 1.8  | 1.1    | 2.8  | 24                  | 2.4  | 1.5    | 3.6  |
| Investigations (10022891)                                                      | 1                   | 0.1  | 0.0    | 0.6  | 0                   | 0.0  | 0.0    | 0.4  |
| Metabolism and nutrition disorders (10027433)                                  | 1                   | 0.1  | 0.0    | 0.6  | 0                   | 0.0  | 0.0    | 0.4  |
| Musculoskeletal and connective tissue disorders (10028395)                     | 3                   | 0.3  | 0.1    | 0.9  | 7                   | 0.7  | 0.3    | 1.4  |
| Neoplasms benign, malignant and unspecified (incl cysts and polyps) (10029104) | 0                   | 0.0  | 0.0    | 0.4  | 1                   | 0.1  | 0.0    | 0.6  |
| Nervous system disorders (10029205)                                            | 5                   | 0.5  | 0.2    | 1.2  | 3                   | 0.3  | 0.1    | 0.9  |

|                                                            | Placebo<br>N = 1000 |     |        |     | Vaccine<br>N = 1000 |     |        |     |
|------------------------------------------------------------|---------------------|-----|--------|-----|---------------------|-----|--------|-----|
|                                                            | n                   | %   | 95% CI |     | n                   | %   | 95% CI |     |
| LL                                                         |                     |     | UL     | LL  |                     |     | UL     |     |
| <b>Primary System Organ Class (CODE)</b>                   |                     |     |        |     |                     |     |        |     |
| Pregnancy, puerperium and perinatal conditions (10036585)  | 1                   | 0.1 | 0.0    | 0.6 | 1                   | 0.1 | 0.0    | 0.6 |
| Psychiatric disorders (10037175)                           | 4                   | 0.4 | 0.1    | 1.0 | 5                   | 0.5 | 0.2    | 1.2 |
| Renal and urinary disorders (10038359)                     | 1                   | 0.1 | 0.0    | 0.6 | 3                   | 0.3 | 0.1    | 0.9 |
| Reproductive system and breast disorders (10038604)        | 2                   | 0.2 | 0.0    | 0.7 | 2                   | 0.2 | 0.0    | 0.7 |
| Respiratory, thoracic and mediastinal disorders (10038738) | 5                   | 0.5 | 0.2    | 1.2 | 2                   | 0.2 | 0.0    | 0.7 |
| Skin and subcutaneous tissue disorders (10040785)          | 0                   | 0.0 | 0.0    | 0.4 | 3                   | 0.3 | 0.1    | 0.9 |
| Social circumstances (10041244)                            | 1                   | 0.1 | 0.0    | 0.6 | 0                   | 0.0 | 0.0    | 0.4 |
| Surgical and medical procedures (10042613)                 | 2                   | 0.2 | 0.0    | 0.7 | 4                   | 0.4 | 0.1    | 1.0 |
| Vascular disorders (10047065)                              | 2                   | 0.2 | 0.0    | 0.7 | 3                   | 0.3 | 0.1    | 0.9 |

At least one symptom = at least one symptom experienced (regardless of the MedDRA Primary System Organ Class)

N = number of subjects with at least one administered dose

n/% = number/percentage of subjects reporting at least once the symptom

95% CI= exact 95% confidence interval; LL = Lower Limit, UL = Upper Limit

Leptospirosis was the only serious adverse event for which vaccine and placebo group incidence rates were statistically different. The incidence rates in the vaccine and placebo groups respectively were 0.2% and 1.2%; the rate difference was -1.0%, in favor of the vaccine group (95% confidence interval -1.91%, -0.32%; P=0.013). As testing for leptospirosis was triggered by a clinical diagnosis of hepatitis, and as hepatitis E accounted for the great majority of all clinical hepatitis, there was less testing in the vaccine group. This case ascertainment bias most likely explains the observed rate difference.

Table S12 lists the 7 deaths observed during the study. The subject with cholangiocarcinoma (bile duct cancer) in retrospect had evidence of disease prior to enrolment

**Table S12 Percentage of subjects who died during the study and reporting the occurrence of Serious Adverse Events classified by MedDRA Primary System Organ Class and Preferred Term, during the entire follow-up period (Total vaccinated cohort)**

|                                                                                |                             | Placebo<br>N = 1000 |     |        |     | Vaccine<br>N = 1000 |     |        |     |
|--------------------------------------------------------------------------------|-----------------------------|---------------------|-----|--------|-----|---------------------|-----|--------|-----|
|                                                                                |                             |                     |     | 95% CI |     |                     |     | 95% CI |     |
| Primary System Organ Class (CODE)                                              | Preferred Term (CODE)       | n                   | %   | LL     | UL  | n                   | %   | LL     | UL  |
| At least one symptom                                                           |                             | 1                   | 0.1 | 0.0    | 0.6 | 6                   | 0.6 | 0.2    | 1.3 |
| General disorders and administration site conditions (10018065)                | Accidental death (10063746) | 1                   | 0.1 | 0.0    | 0.6 | 0                   | 0.0 | 0.0    | 0.4 |
|                                                                                | Death (10011906)            | 0                   | 0.0 | 0.0    | 0.4 | 5                   | 0.5 | 0.2    | 1.2 |
| Neoplasms benign, malignant and unspecified (incl cysts and polyps) (10029104) | Bile duct cancer (10004593) | 0                   | 0.0 | 0.0    | 0.4 | 1                   | 0.1 | 0.0    | 0.6 |

At least one symptom = at least one symptom experienced (regardless of the MedDRA Preferred Term)

N = number of subjects with at least one administered dose

n/% = number/percentage of subjects reporting at least once the symptom

95% CI= exact 95% confidence interval; LL = Lower Limit, UL = Upper Limit
